# Supplementary material for: Regulation of the tenogenic gene expression in equine tenocyte-derived induced pluripotent stem cells by mechanical loading and Mohawk
Source: PubMed Central journal article supplement (PMC7082636; doi:10.1016/j.scr.2019.101489), 2019-06-27

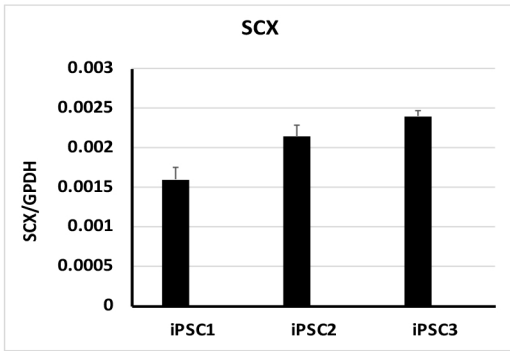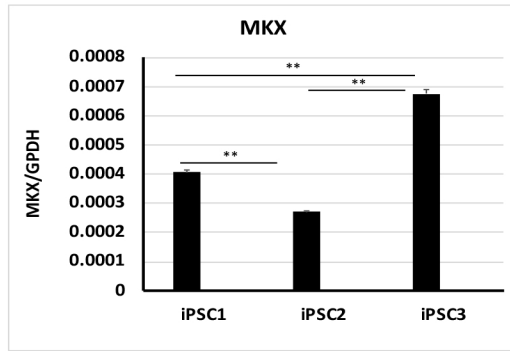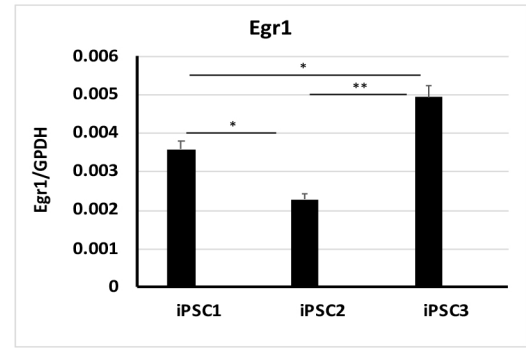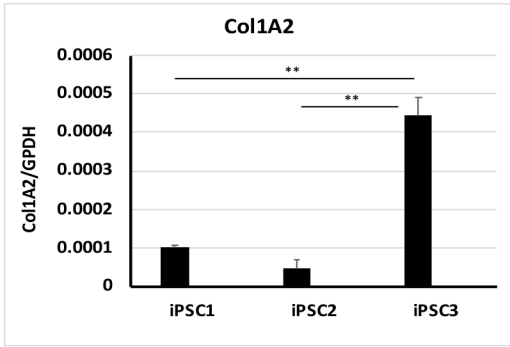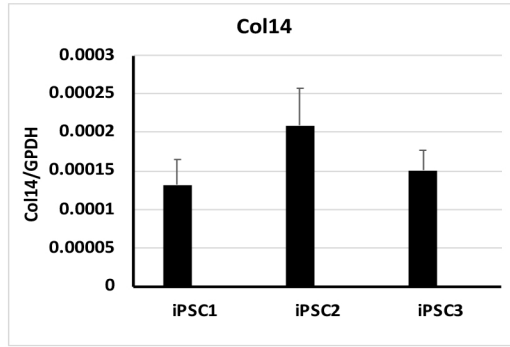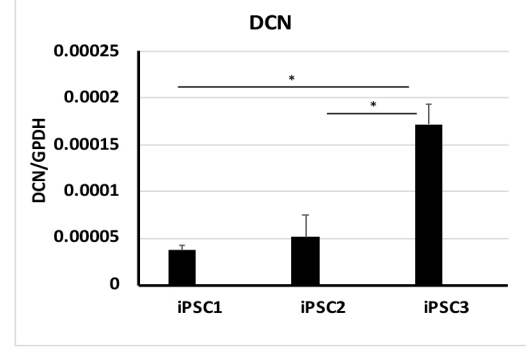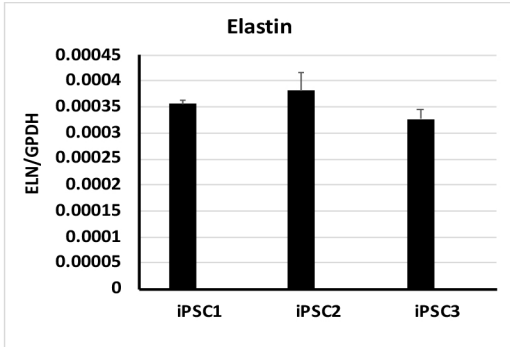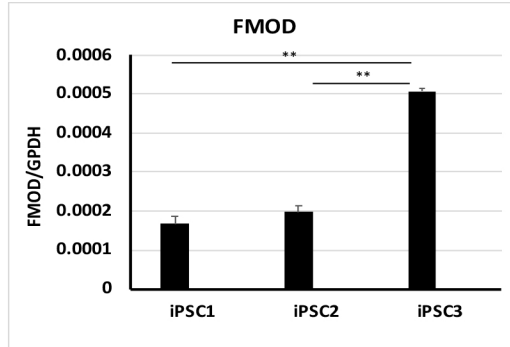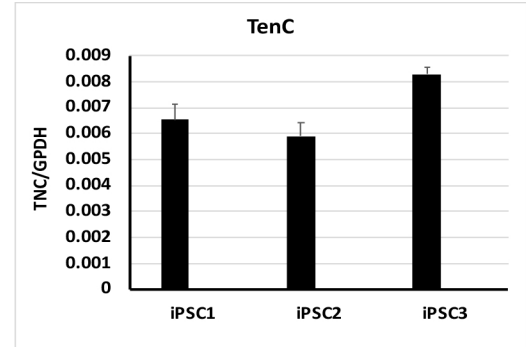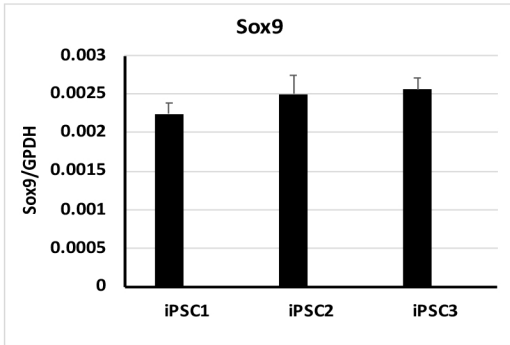

Supplement: NIHMS1539478-supplement-3.pdf [file NIHMS1539478-supplement-3.pdf]
